# Supplementary material for: Fluorescent visual quantitation of cell-secreted sialoglycoconjugates by chemoselective recognition and hybridization chain reaction
Source: Royal Society of Chemistry journal article supplement (doi:10.1039/c9an00572b), 2019-01-01
Supplement: c9an00572b1.pdf [file c9an00572b1.pdf]

## Supporting information

### Fluorescent visual quantitation of cell-secreted sialoglycoconjugates by chemoselective recognition and hybridization chain reaction

Yingying Xiong,<sup>†a</sup> Yunlong Chen,<sup>†a</sup> Lin Ding,<sup>a</sup> Xiaoqiang Liu,<sup>b</sup> Huangxian Ju<sup>\*a</sup>

<sup>a</sup> State Key Laboratory of Analytical Chemistry for Life Science, School of Chemistry and Chemical Engineering, Nanjing University, Nanjing 210023, P. R. China

<sup>b</sup> College of Chemistry and Chemical Engineering, Henan University, Kaifeng, Henan Province, 475004, P.R. China

\* Corresponding author. *E-mail*: hxju@nju.edu.cn (H X. Ju).

**Table S1.** Sequences of oligonucleotides used in this work.

|                       |                                                                     |
|-----------------------|---------------------------------------------------------------------|
| DBCO-labeled primer   | 5'-CCAAACCGAAAGAACAATGGACCC-DBCO-3'                                 |
| DBCO-unlabeled primer | 5'-CCAAACCGAAAGAACAATGGACCC-3'                                      |
| HCR hairpin H1        | 5'-<br>GGGTCCATTGTTCTTTTCGGTTTGGGTAGAGCCAAACCGA<br>AAGAACAAT-Cy3-3' |
| HCR hairpin H2        | 5'-Cy3-<br>CCAAACCGAAAGAACAATGGACCCATTGTTCTTTTCGGTT<br>TGGCTCTAC-3' |

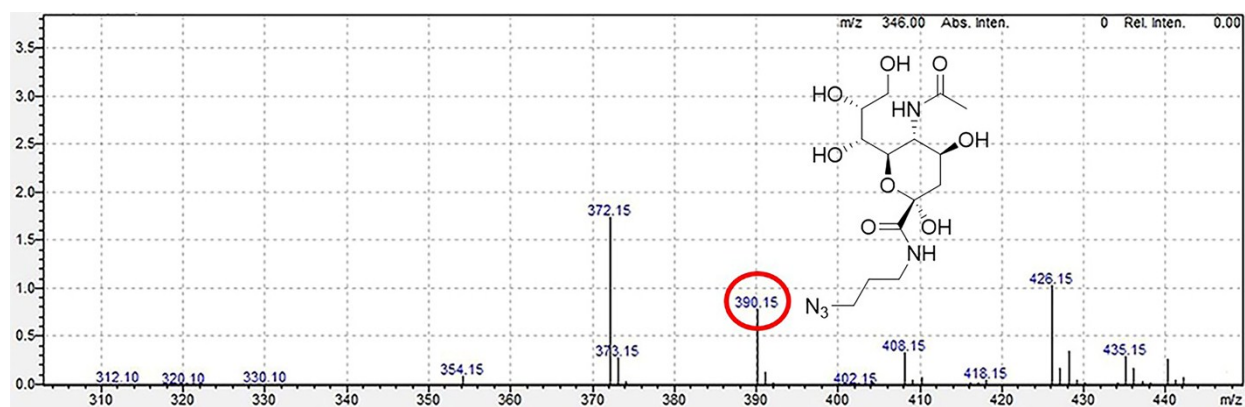

**Figure S1.** ESI mass spectrum of the synthetic azide-modified SA.

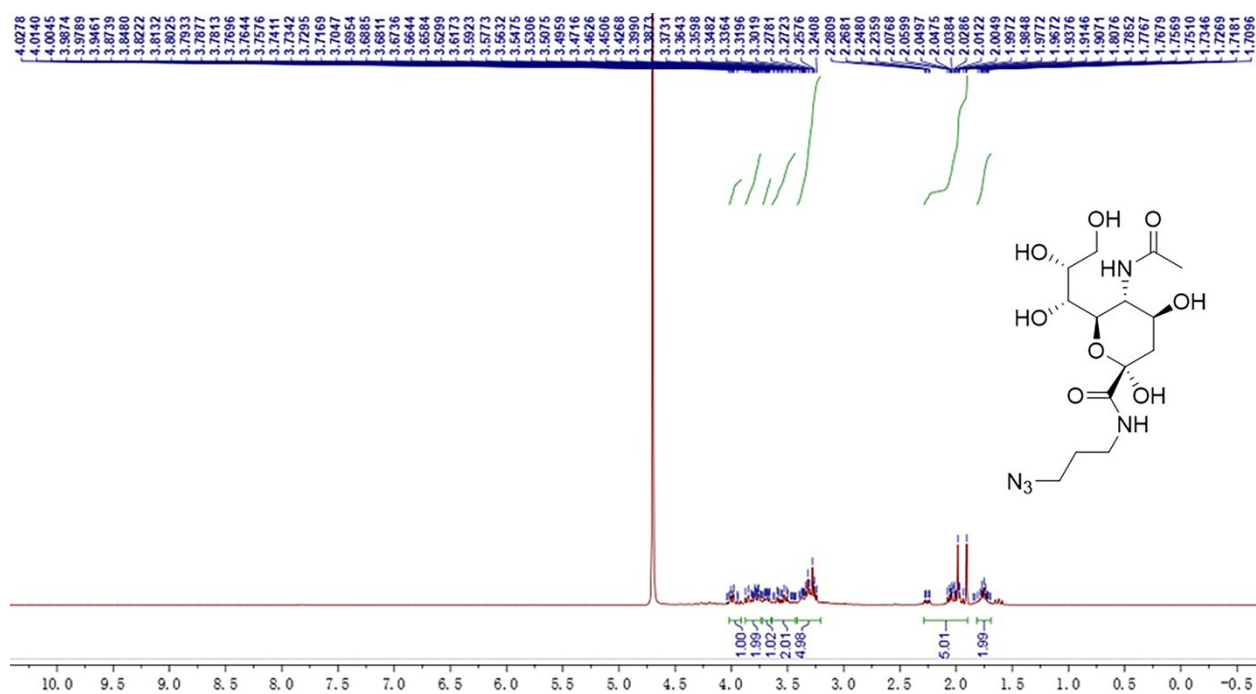

**Figure S2.** <sup>1</sup>H NMR spectrum of the synthetic azide-modified SA.

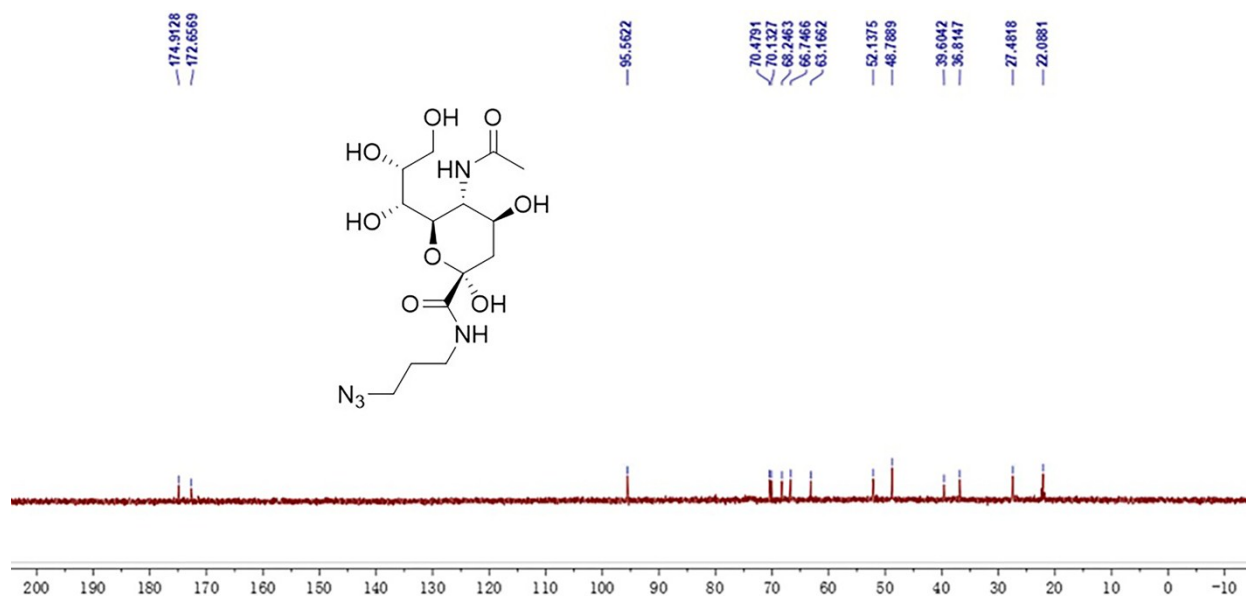

**Figure S3.** <sup>13</sup>C NMR spectrum of the synthetic azide-modified SA.

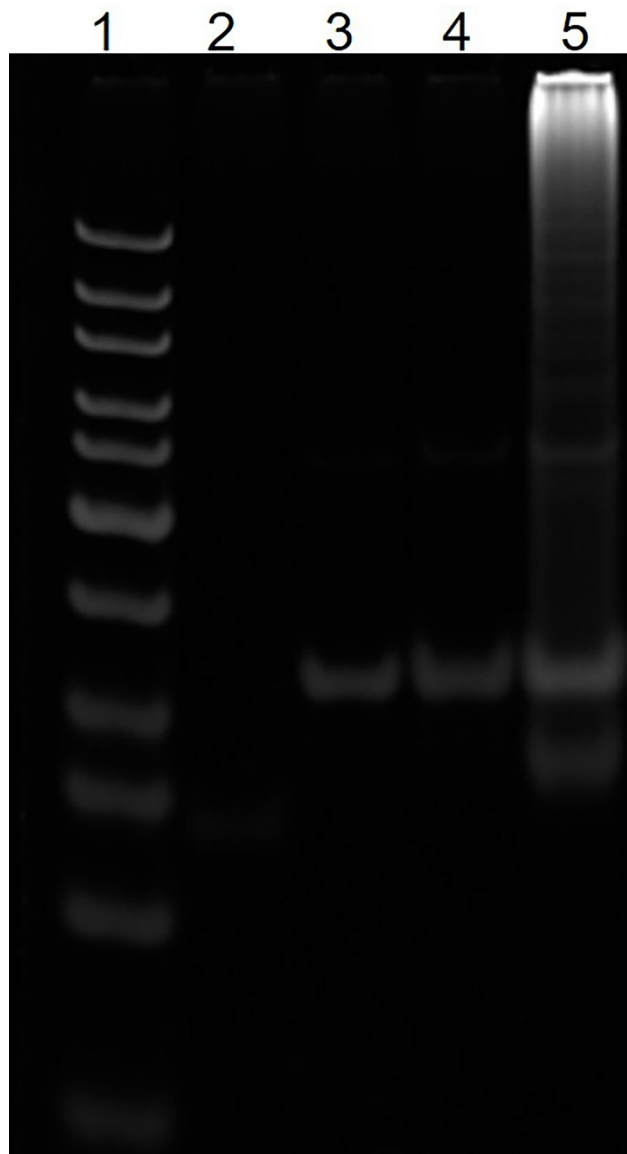

**Figure S4.** Gel electrophoresis image of (1) DNA ladder, (2) HCR primer, (3) annealed HCR hairpin H1, (4) annealed HCR hairpin H2 and (5) hybridization product of HCR primer, H1 and H2.

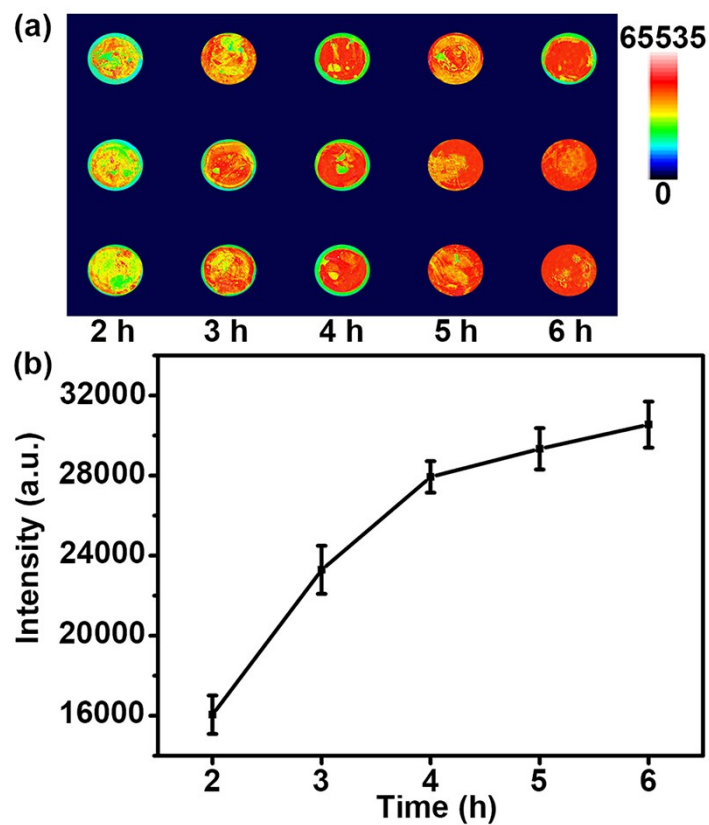

**Figure S5.** (a) Fluorescent image of metabolically labeled SiaGCs secreted from HeLa cells with different capture times, and (b) plot of fluorescent intensity vs. capture time.

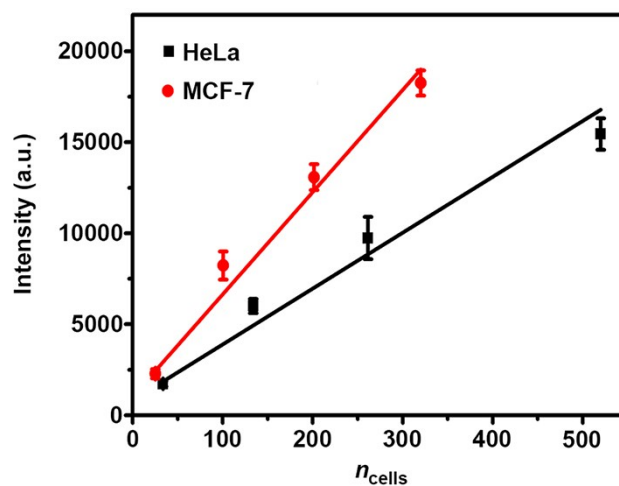

**Figure S6.** Plot of fluorescent intensity vs. numbers of HeLa and MCF-7 cells for secreting  $\text{Ac}_4\text{ManNAz}$ -labeled SiaGCs.

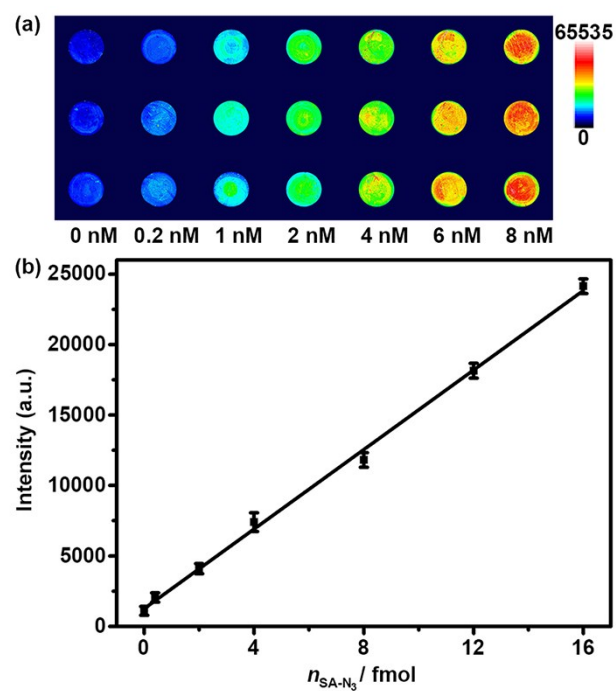

**Figure S7.** (a) Fluorescent image of synthetic azide-modified SA at different concentrations, and (b) plot of fluorescent intensity *vs.* amount of synthetic azide-modified SA.
